# Supplementary material
Source: publisher site journal article supplement (https://www.dovepress.com/article/267346)
Supplement: Supplementary file 1 [file get_supplementary_file.php]

**Table S1. Hypertension Awareness, Treatment, and Control in southern China by age and sex, 2012 and 2019**

|  | Male | | Female | | Total | |
| --- | --- | --- | --- | --- | --- | --- |
| Age group, years | 2012 | 2019 | 2012 | 2019 | 2012 | 2019 |
| Awareness, % |  |  |  |  |  |  |
| 35-44 | 23.7 | 48.6 | 24.2 | 42.6 | 23.9 | 46.2 |
| 45-54 | 39.1 | 59.1 | 38.3 | 50.6 | 38.7 | 54.6 |
| 55-64 | 44.3 | 63.6 | 50.6 | 62.2 | 47.7 | 62.8 |
| 65-75 | 55.1 | 69.0 | 56.1 | 69.1 | 55.6 | 69.0 |
| Total | 43.7 | 61.9 | 47.4 | 59.6 | 45.6 | 60.7 |
| Treatment, % |  |  |  |  |  |  |
| 35-44 | 17.2 | 40.6 | 20.4 | 34.5 | 18.4 | 38.1 |
| 45-54 | 34.6 | 49.6 | 32.9 | 42.9 | 33.8 | 46.0 |
| 55-64 | 37.6 | 51.7 | 46.4 | 52.4 | 42.4 | 52.1 |
| 65-75 | 50.1 | 60.0 | 53.0 | 61.4 | 51.6 | 60.8 |
| Total | 38.2 | 52.0 | 43.4 | 51.1 | 40.8 | 51.5 |
| Control, % |  |  |  |  |  |  |
| 35-44 | 5.2 | 24.8 | 10.8 | 19.3 | 7.3 | 22.6 |
| 45-54 | 12.7 | 27.6 | 11.2 | 21.4 | 11.9 | 24.3 |
| 55-64 | 15.4 | 23.5 | 17.2 | 22.7 | 16.4 | 23.0 |
| 65-75 | 18.5 | 25.2 | 18.7 | 22.9 | 18.6 | 23.9 |
| Total | 14.3 | 25.3 | 15.8 | 22.2 | 15.1 | 23.6 |
| Treatment controlled, % | | | | | | |
| 35-44 | 30.2 | 53.5 | 52.6 | 51.6 | 39.6 | 52.8 |
| 45-54 | 36.7 | 50.7 | 33.9 | 45.0 | 35.3 | 47.8 |
| 55-64 | 41.0 | 40.0 | 37.0 | 39.0 | 38.6 | 39.4 |
| 65-75 | 36.8 | 38.7 | 35.3 | 34.3 | 36.0 | 36.2 |
| Total | 37.5 | 43.9 | 36.4 | 39.3 | 36.9 | 41.4 |

**Table S2.** **Distribution of main risk factors for hypertension in 2012 and 2019**

|  | 2012 | | |  |
| --- | --- | --- | --- | --- |
| Men | Women | Overall |  |
|  | No. (Rate) | No. (Rate) | No. (Rate) | *P* |
| Age ≥60 years | 1062 (50.4%) | 1212 (54.9%) | 2274 (52.7%) | <0.001 |
| Current smoking | 946 (44.9%) | 34 (1.5%) | 980 (22.7%) | <0.001 |
| Alcohol drinking | 478 (22.7%) | 73 (3.3%) | 551 (12.8%) | <0.001 |
| Overweight or obesity | 1251 (59.3%) | 1282 (58.1%) | 2533 (58.7%) | <0.001 |
| Central obesity | 1024 (48.6%) | 1226 (55.6%) | 2250 (52.1%) | <0.001 |
|  | 2019 | | |  |
| Men | Women | Overall |  |
|  | No. (Rate) | No. (Rate) | No. (Rate) | *P* |
| Age ≥60 years | 2315 (44.1%) | 3101 (48.5%) | 5416 (46.5%) | <0.001 |
| Current smoking | 2233 (42.5%) | 46 (0.7%) | 2279 (19.6%) | <0.001 |
| Alcohol drinking | 716 (13.6%) | 33 (0.5%) | 749 (6.4%) | <0.001 |
| Overweight or obesity | 3316 (63.2%) | 3620 (56.6%) | 6936 (59.5%) | <0.001 |
| Central obesity | 2540 (48.4%) | 3056 (47.8%) | 5596 (48.0%) | 0.514 |

**Table S3. Prevalence and odds ratios of factors associated with awareness, treatment, and control rates of hypertension in the southern Chinese**

|  | 2012 | | |  | 2019 | | |
| --- | --- | --- | --- | --- | --- | --- | --- |
|  | Awareness  OR (95% CI) | Treatment  OR (95% CI) | Control  OR (95% CI) |  | Awareness  OR (95% CI) | Treatment  OR (95% CI) | Control  OR (95% CI) |
| Age | 1.044(1.038,1.051) | 1.049(1.042,1.056) | 1.032(1.023,1.041) |  | 1.035(1.030,1.039) | 1.033(1.028,1.037) | 1.000(0.996,1.005) |
| Sex |  |  |  |  |  |  |  |
| male | 1.0 | 1.0 | 1.0 |  | 1.0 | 1.0 | 1.0 |
| female | 1.161(1.03,1.309) | 1.241(1.099,1.402) | 1.121(0.948,1.325) |  | 0.909(0.843,0.98) | 0.967(0.899,1.04) | 0.840(0.771,0.915) |
| BMI |  |  |  |  |  |  |  |
| <18.5 | 1.0 | 1.0 | 1.0 |  | 1.0 | 1.0 | 1.0 |
| 18.5-23.9 | 1.647(1.088,2.493) | 1.533(1.001,2.347) | 1.143(0.642,2.035) |  | 1.490(1.130,1.966) | 1.505(1.131,2.003) | 1.197(0.845,1.696) |
| 24-27.9 | 2.056(1.36,3.109) | 1.939(1.268,2.964) | 1.25(0.704,2.222) |  | 2.050(1.554,2.703) | 2.026(1.524,2.694) | 1.359(0.961,1.923) |
| ≥28 | 2.444(1.594,3.747) | 2.277(1.47,3.529) | 1.49(0.825,2.688) |  | 2.227(1.673,2.965) | 2.196(1.638,2.945) | 1.296(0.908,1.851) |
| Education |  |  |  |  |  |  |  |
| Primary school or below | 1.0 | 1.0 | 1.0 |  | 1.0 | 1.0 | 1.0 |
| Junior high school | 0.845(0.735,0.971) | 0.855(0.743,0.984) | 1.025(0.845,1.243) |  | 0.916(0.840,1.000) | 0.941(0.864,1.025) | 1.279(1.154,1.417) |
| senior high school or above | 0.82(0.698,0.963) | 0.817(0.694,0.962) | 1.04(0.832,1.298) |  | 0.903(0.821,0.992) | 0.961(0.877,1.054) | 1.505(1.351,1.676) |
| Smoke |  |  |  |  |  |  |  |
| No | 1.0 | 1.0 | 1.0 |  | 1.0 | 1.0 | 1.0 |
| Yes | 0.786(0.68,0.908) | 0.735(0.634,0.853) | 0.819(0.665,1.007) |  | 0.933(0.85,1.025) | 0.862(0.786,0.944) | 1.023(0.919,1.139) |
| Alcohol |  |  |  |  |  |  |  |
| No | 1.0 | 1.0 | 1.0 |  | 1.0 | 1.0 | 1.0 |
| Yes | 0.787(0.656,0.943) | 0.663(0.548,0.801) | 0.799(0.612,1.042) |  | 0.728(0.628,0.845) | 0.701(0.604,0.814) | 0.711(0.588,0.860) |
| Central obesity |  |  |  |  |  |  |  |
| No | 1.0 | 1.0 | 1.0 |  | 1.0 | 1.0 | 1.0 |
| Yes | 1.399(1.24,1.578) | 1.428(1.263,1.614) | 1.177(0.995,1.393) |  | 1.434(1.329,1.547) | 1.402(1.302,1.511) | 1.129(1.034,1.233) |

BMI, body mass index.

**Table S4. The prevalence and control rates of hypertension overall and among treated hypertensives according to the classifications of the 2017 ACC/AHA guideline**

|  | 2012 | | | | | | | |  | 2019 | | | | | | | |
| --- | --- | --- | --- | --- | --- | --- | --- | --- | --- | --- | --- | --- | --- | --- | --- | --- | --- |
| Age group | male | |  | female | |  | total | |  | male | |  | female | |  | total | |
|  | Rate, % | 95%CI |  | Rate, % | 95%CI |  | Rate, % | 95%CI |  | Rate, % | 95%CI |  | Rate, % | 95%CI |  | Rate, % | 95%CI |
| Prevalence | | | | | | | | | | | | | | | | | |
| 35-44 | 55.2 | 52.6-57.8 |  | 35.1 | 32.8-37.5 |  | 44.5 | 42.8-46.3 |  | 55.7 | 53.6-57.7 |  | 32.1 | 30.6-33.7 |  | 41.3 | 40.1-42.6 |
| 45-54 | 67.2 | 64.6-69.8 |  | 57.6 | 55.1-60 |  | 61.9 | 60.1-63.6 |  | 68.3 | 66.8-69.9 |  | 54.4 | 53.1-55.7 |  | 59.7 | 58.7-60.7 |
| 55-64 | 78.5 | 76-80.8 |  | 73.4 | 71-75.8 |  | 75.7 | 74-77.4 |  | 77.5 | 76-79 |  | 70.9 | 69.5-72.2 |  | 73.5 | 72.5-74.5 |
| 65-75 | 81.5 | 79.1-83.7 |  | 80.8 | 78.5-82.9 |  | 81.1 | 79.5-82.7 |  | 79.1 | 77.4-80.8 |  | 79.4 | 77.9-80.9 |  | 79.3 | 78.2-80.4 |
| Total | 69.6 | 68.3-70.9 |  | 60.0 | 58.8-61.3 |  | 64.5 | 63.6-65.4 |  | 70.4 | 69.6-71.3 |  | 58.4 | 57.7-59.2 |  | 63.2 | 62.6-63.8 |
| Control |  |  |  |  |  |  |  |  |  |  |  |  |  |  |  |  |  |
| 35-44 | 1.0 | 0.4-2 |  | 0.9 | 0.3-2.0 |  | 1.0 | 0.5-1.6 |  | 3.8 | 2.8-5.0 |  | 3.0 | 2.1-4.2 |  | 3.5 | 2.8-4.3 |
| 45-54 | 1.7 | 1-2.8 |  | 2.1 | 1.3-3.3 |  | 1.9 | 1.3-2.7 |  | 4.8 | 4.0-5.8 |  | 4.2 | 3.5-5.0 |  | 4.5 | 3.9-5.1 |
| 55-64 | 3.1 | 2.1-4.5 |  | 4.7 | 3.5-6.2 |  | 4.0 | 3.1-4.9 |  | 4.9 | 4.1-5.9 |  | 5.3 | 4.5-6.1 |  | 5.1 | 4.6-5.8 |
| 65-75 | 4.4 | 3.2-5.9 |  | 4.8 | 3.6-6.3 |  | 4.6 | 3.7-5.7 |  | 5.4 | 4.4-6.6 |  | 5.9 | 5.0-7.0 |  | 5.7 | 5-6.5 |
| Total | 2.6 | 2.1-3.2 |  | 3.4 | 2.9-4.1 |  | 3.0 | 2.7-3.5 |  | 4.8 | 4.4-5.3 |  | 4.8 | 4.4-5.3 |  | 4.8 | 4.5-5.2 |
| Control among treated patients | | |  |  |  |  |  |  |  |  |  |  |  |  |  |  |  |
| 35-44 | 15.1 | 6.7-27.6 |  | 13.2 | 4.4-28.1 |  | 14.3 | 7.8-23.2 |  | 18.2 | 13.8-23.4 |  | 22.3 | 16.0-29.6 |  | 19.7 | 16.0-23.8 |
| 45-54 | 8.9 | 5.1-14.2 |  | 11.7 | 7.3-17.5 |  | 10.3 | 7.3-14 |  | 14.9 | 12.5-17.7 |  | 17.0 | 14.4-19.9 |  | 16.0 | 14.2-17.9 |
| 55-64 | 12.3 | 8.4-17.3 |  | 14.5 | 10.9-18.7 |  | 13.6 | 10.9-16.7 |  | 13.3 | 11.0-15.7 |  | 13.8 | 11.9-15.8 |  | 13.6 | 12.1-15.1 |
| 65-75 | 11.8 | 8.6-15.6 |  | 11.8 | 8.8-15.3 |  | 11.8 | 9.6-14.3 |  | 11.6 | 9.5-13.9 |  | 12.0 | 10.2-14.0 |  | 11.8 | 10.4-13.3 |
| Total | 11.6 | 9.4-14 |  | 12.7 | 10.7-15 |  | 12.2 | 10.7-13.8 |  | 13.7 | 12.4-15.0 |  | 14.3 | 13.1-15.5 |  | 14.0 | 13.1-14.9 |

CI, confidence interval


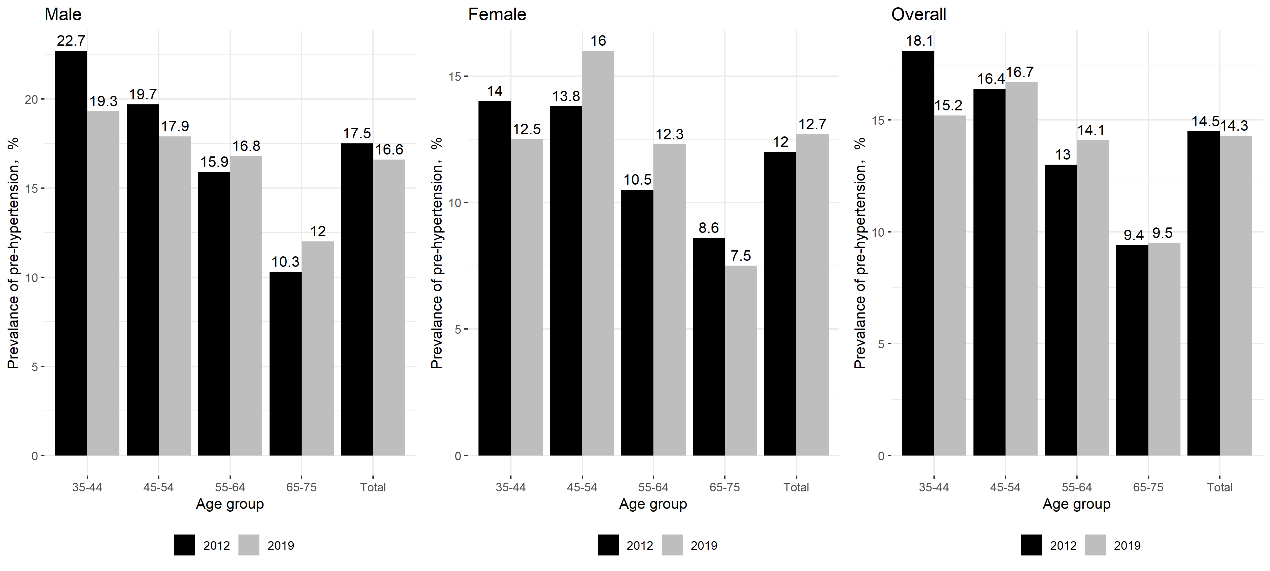


**Figure S1. Distribution of prehypertension in 2012 and 2019.**
